# Supplementary material for: APOL1 Kidney Risk Variants and Long-Term Kidney Function in Healthy Middle-Aged Black Individuals: The Atherosclerosis Risk in Communities (ARIC) Study
Source: PubMed Central journal article supplement — Kidney Med. 2024 Apr 17;6(6):100828. doi: 10.1016/j.xkme.2024.100828 (PMC11127222; doi:10.1016/j.xkme.2024.100828), 2024-04-17
Supplement: mmc1.pdf [file mmc1.pdf]

Figure S1: Comparison of kidney function at follow-up based on race/APOL1 status of the participants using the race inclusive CKD-EPI 2012 creatinine-cystatin C GFR calculator

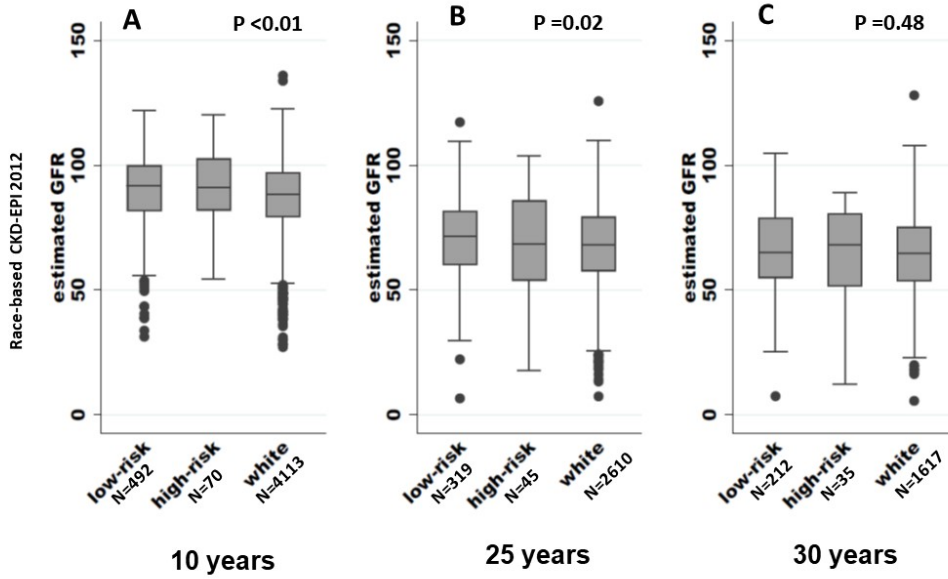

**Table S1:** Comparison of baseline characteristics of participants with high-risk APOL1 genotype who did and did not have follow-up data on kidney function at 25 years

|                                                | With follow-up<br>(N= 45) | Without follow-up<br>(N=65) | p-value |
|------------------------------------------------|---------------------------|-----------------------------|---------|
| Age, years                                     | 50±5                      | 51±5                        | 0.3     |
| Women                                          | 27 (60%)                  | 39 (60%)                    | >1.0    |
| Body mass index, kg/m <sup>2</sup>             | 27±3                      | 26±4                        | 0.2     |
| Systolic blood pressure, mmHg                  | 118±11                    | 116±12                      | 0.35    |
| Diastolic blood pressure, mmHg                 | 75±8                      | 74±8                        | 0.5     |
| eGFR-creatinine, mL/min/1.73m <sup>2</sup>     | 104±11                    | 104±9                       | 1.0     |
| College graduate                               | 20 (44%)                  | 22 (34%)                    | 0.3     |
| Employed full- or part-time                    | 39 (87%)                  | 51 (78%)                    | 0.3     |
| Current smoker                                 | 9 (20%)                   | 31 (48%)                    | 0.01    |
| Family history of diabetes                     | 5 (11%)                   | 9 (14%)                     | 0.7     |
| Family history of hypertension                 | 11 (24%)                  | 15 (23%)                    | 0.9     |
| Established care with a primary care physician | 41 (91%)                  | 49 (75%)                    | 0.03    |

Data represented as mean±standard deviation

The above data was obtained via publicly available ARIC dataset (not USRDS)
